# Supplementary material for: Linking Ecology and Epidemiology to Understand Predictors of Multi-Host Responses to an Emerging Pathogen, the Amphibian Chytrid Fungus
Source: PubMed Central journal article supplement (PMC5240985; doi:10.1371/journal.pone.0167882), 2017-01-17
Supplement: pone.0167882.s001.pdf [file pone.0167882.s001.pdf]

**S1 Table S1. Summary of species traits and amphibian responses to *Batrachochytrium dendrobatidis*.**

Genus abbreviations: A = *Anaxyrus*; H = *Hyla*; P = *Pseudacris*; R = *Rana*; L = *Lithobates*. Other abbreviations: Ave = Average, SVL = snout-vent-length. Sample sizes for each species are provided in Table S7. Hazard ratios presented in column 4 were obtained from Cox Proportional Hazards models that were fit without covariates, which explains why exact values differ from those previously reported [32, 38]. Log response ratio in column 5 denotes the effect size for differences in average number of days survived between the two treatments, Bd-exposed and Control, and was calculated as  $\text{Ln}(X_t / X_c)$ , where Ln equals the natural log,  $X_t$  = the average number of days survived in the Bd treatment group, and  $X_c$  is the average number of days survived in the control group. Smaller log response ratio values indicate a larger negative effect of Bd on amphibian survival. Average infection intensity in column 7 was calculated across the entire 30 d experiment for all Bd-exposed animals. All infection intensity estimates are provided as raw (untransformed) genome equivalent values from quantitative-PCR analysis. Average infection intensities recovered from amphibians who died versus those who survived are provided in column 8; n/a indicates that no individuals survived to the end of the experiment, and only average infection load values (column 7) are applicable. For column 4 and 6, n/a indicates no HR calculated due to data distribution precluding analysis and absence of mortality for *A. terrestris* and *H. squirella*, respectively.

| Species                   | Ave mass | Ave SVL | Hazard ratio for treatment effect | Log response ratio for treatment effect | Day @ 50% mortality in Bd-exposed | Ave infection load (30d total) | Ave infection load of individuals that died versus survived in experiment | % of animals survived in Bd-treatment | % of Bd-exposed individuals that were Bd-negative | Infection load coefficient of variation | Range of infection load values (min versus max detected) |
|---------------------------|----------|---------|-----------------------------------|-----------------------------------------|-----------------------------------|--------------------------------|---------------------------------------------------------------------------|---------------------------------------|---------------------------------------------------|-----------------------------------------|----------------------------------------------------------|
| <i>A. americanus</i>      | 0.20     | 12.33   | 48.3                              | -1.231                                  | 3                                 | 206.19                         | n/a                                                                       | 0                                     | 0                                                 | 1.56                                    | 15.0 - 1630                                              |
| <i>A. boreas</i>          | 0.21     | 11.87   | 17.7                              | -0.783                                  | 12                                | 1473.41                        | n/a                                                                       | 0                                     | 0                                                 | 1.29                                    | 58.3 - 8415                                              |
| <i>A. fowleri</i>         | 0.28*    | 14.21   | 37.4                              | -1.508                                  | 5                                 | 313.38                         | n/a                                                                       | 0                                     | 0                                                 | 1.19                                    | 4.69 -1239                                               |
| <i>A. terrestris</i>      | 0.15     | 11.45   | n/a                               | -2.014                                  | 3                                 | 174.05                         | n/a                                                                       | 0                                     | 0                                                 | 0.90                                    | 1.91 - 545                                               |
| <i>H. squirella</i>       | 0.25     | 14.56   | 1                                 | undefined                               | n/a                               | 710.75                         | n/a                                                                       | 100                                   | 0                                                 | 1.69                                    | 1.59 - 3510                                              |
| <i>H. versicolor</i>      | 0.27^    | 14.61   | 2.83                              | -0.978                                  | 2                                 | 57.35                          | n/a                                                                       | 0                                     | 0                                                 | 1.27                                    | 0.59 - 335                                               |
| <i>H. wrightorum</i>      | 0.38     | 14.95   | 22                                | -0.244                                  | 24.5                              | 357.08                         | 570.52 / 58.26                                                            | 42                                    | 0                                                 | 1.81                                    | 3.54 - 2690                                              |
| <i>L. catesbeianus</i>    | 1.31*^   | 24.95   | 11.4                              | -0.957                                  | 5                                 | 43.1                           | 56.25 / 0.35                                                              | 24                                    | 12                                                | 1.04                                    | 0 - 141                                                  |
| <i>L. clamitans</i>       | 1.13^    | 20.98   | 3.34                              | -0.805                                  | 4.5                               | 112.89                         | 138.59 / 10.06                                                            | 20                                    | 0                                                 | 2.22                                    | 1.95 - 819                                               |
| <i>L. pipiens</i>         | 1.00*^   | 23.39   | 5.51                              | -1.302                                  | 2                                 | 98.59                          | 102.68 / 0.283                                                            | 4                                     | 0                                                 | 0.92                                    | 0.09 - 329                                               |
| <i>L. sphenoccephalus</i> | 0.81*    | 20.82   | 65.2                              | -1.450                                  | 3                                 | 358.33                         | 389.49 / 0                                                                | 8                                     | 8                                                 | 0.78                                    | 0 - 1029                                                 |
| <i>L. sylvaticus</i>      | 0.30*^   | 15.16   | 20                                | -2.097                                  | 2                                 | 133.25                         | n/a                                                                       | 0                                     | 0                                                 | 1.12                                    | 8.41 - 616                                               |
| <i>P. crucifer</i>        | 0.16*    | 12.78   | 4.59                              | -0.471                                  | 15                                | 1.41                           | 1.53 / 0.007                                                              | 8                                     | 4                                                 | 1.11                                    | 0 - 5.35                                                 |
| <i>P feriarum</i>         | 0.20     | 13.14   | 4.7                               | -1.063                                  | 5                                 | 281.32                         | n/a                                                                       | 0                                     | 0                                                 | 0.97                                    | 12.3 - 954                                               |

|                        |        |       |      |        |    |         |               |    |     |      |             |
|------------------------|--------|-------|------|--------|----|---------|---------------|----|-----|------|-------------|
| <i>P. ornata</i>       | 0.46   | 15.60 | 41.6 | -0.930 | 11 | 4530.42 | n/a           | 0  | 0   | 0.81 | 678 - 12029 |
| <i>P. regilla</i>      | 0.30   | 14.13 | 37.5 | -1.669 | 3  | 118.86  | n/a           | 0  | 0   | 2.14 | 1.56 - 983  |
| <i>P. triseriata</i>   | 0.17*^ | 13.20 | 16.9 | -0.592 | 16 | 72.63   | 82.34 / 1.39  | 12 | 8   | 1.61 | 0 - 396     |
| <i>R. aurora</i>       | 0.62   | 18.02 | 4.72 | -0.938 | 3  | 49.7    | 64.13 / 0.61  | 23 | 4.5 | 1.58 | 0 - 292     |
| <i>R. cascadae</i>     | 0.46*  | 16.05 | 5.35 | -0.623 | 7  | 66.79   | 82.21 / 0     | 19 | 19  | 1.93 | 0 - 457     |
| <i>R. luteiventris</i> | 0.58^  | 18.30 | 5.43 | -0.608 | 19 | 121.21  | 145.27 / 0.72 | 17 | 4   | 1.98 | 0 - 1070    |

Asterisks signs (\*) next to average mass values indicate species for which the effect of mass on days survived was significant at P = 0.05 in a Cox regression model. In all cases, greater mass was associated with longer survival times. Caret signs (^) next to average mass values indicate species for which the effect of mass on infection intensity was significant at P = 0.05 in a linear regression model. In all of these species except one (*H. versicolor*) larger starting body mass was associated with lower average experimental infection intensities/infection loads.
