# Supplementary material for: Linking Ecology and Epidemiology to Understand Predictors of Multi-Host Responses to an Emerging Pathogen, the Amphibian Chytrid Fungus
Source: PubMed Central journal article supplement (PMC5240985; doi:10.1371/journal.pone.0167882), 2017-01-17
Supplement: pone.0167882.s006.pdf [file pone.0167882.s006.pdf]

**S6 Table.** Amphibian species information, egg collection location, sample sizes and year of study. Year 1 = 2009; year 2 = 2010; year 3 = 2011; year 4 = 2012.

| Common Name                       | Species Name          | Family            | Location Collected/Collector             | N  | Year of study |
|-----------------------------------|-----------------------|-------------------|------------------------------------------|----|---------------|
| <i>Pseudacris regilla</i>         | Pacific tree frog     | <i>Hylidae</i>    | Jefferson County, OR (Blaustein lab)     | 50 | 3             |
| <i>Pseudacris ornata</i>          | Ornate chorus frog    | <i>Hylidae</i>    | Liberty County, FL (Moriarty Lemmon lab) | 30 | 3             |
| <i>Pseudacris triseriata</i>      | Western chorus frog   | <i>Hylidae</i>    | Livingston County, MI (Relyea lab)       | 50 | 1             |
| <i>Pseudacris crucifer</i>        | Spring peeper         | <i>Hylidae</i>    | Crawford County, PA (Relyea lab)         | 50 | 2             |
| <i>Pseudacris feriarum</i>        | Upland chorus frog    | <i>Hylidae</i>    | Knox County, NC (Price lab)              | 50 | 1             |
| <i>Hyla squirella</i>             | Squirrel tree frog    | <i>Hylidae</i>    | Orange County, FL (Moriarty Lemmon lab)  | 35 | 3             |
| <i>Hyla wrightorum</i>            | Arizona tree frog     | <i>Hylidae</i>    | Coconino County, AZ (Collins lab)        | 49 | 3             |
| <i>Hyla versicolor</i>            | Gray tree frog        | <i>Hylidae</i>    | Crawford County, PA (Relyea lab)         | 50 | 1             |
| <i>Lithobates clamitans</i>       | Green frog            | <i>Ranidae</i>    | Crawford County, PA (Relyea lab)         | 20 | 3             |
| <i>Rana cascadae</i>              | Cascades frog         | <i>Ranidae</i>    | Deschutes County, OR (Blaustein lab)     | 31 | 3             |
| <i>Rana luteiventris</i>          | Columbia spotted frog | <i>Ranidae</i>    | Latah County, ID (Caren Goldberg)        | 49 | 3             |
| <i>Lithobates pipiens</i>         | Northern leopard frog | <i>Ranidae</i>    | Crawford County, PA (Relyea lab)         | 50 | 1             |
| <i>Lithobates sphenoccephalus</i> | Southern leopard frog | <i>Ranidae</i>    | Wakulla County, FL (Susan Walls)         | 50 | 3             |
| <i>Lithobates sylvaticus</i>      | Wood frog             | <i>Ranidae</i>    | Livingston County, MI (Relyea lab)       | 44 | 1             |
| <i>Rana aurora</i>                | Red-legged frog       | <i>Ranidae</i>    | Lane County, OR (Blaustein lab)          | 43 | 3             |
| <i>Lithobates catesbeianus</i>    | American bullfrog     | <i>Ranidae</i>    | Crawford County, PA (Relyea lab)         | 33 | 4             |
| <i>Anaxyrus americanus</i>        | American toad         | <i>Bufo</i> nidae | Crawford County, PA (Relyea lab)         | 50 | 2             |
| <i>Anaxyrus terrestris</i>        | Southern toad         | <i>Bufo</i> nidae | Orange County, FL (Fauth lab)            | 50 | 1             |
| <i>Anaxyrus fowleri</i>           | Fowler's toad         | <i>Bufo</i> nidae | Mecklenburg County, NC (Price lab)       | 47 | 2             |
| <i>Anaxyrus boreas</i>            | Western toad          | <i>Bufo</i> nidae | Deschutes County, OR (Blaustein lab)     | 41 | 3             |
