# Supplementary material for: Linking Ecology and Epidemiology to Understand Predictors of Multi-Host Responses to an Emerging Pathogen, the Amphibian Chytrid Fungus
Source: PubMed Central journal article supplement (PMC5240985; doi:10.1371/journal.pone.0167882), 2017-01-17
Supplement: pone.0167882.s007.pdf [file pone.0167882.s007.pdf]

**S7 Table. Ecological and life-history summaries for species in experimental study.** Information about habitat use and breadth was collected by surveying scientists that have published papers on the focal species in this study. Geographic range area estimates were obtained from [82]. All other ecological and life history traits were collected at the species level by surveying 2 amphibian references [76-77] and 4 global databases [78-81]. We collected all information available from sources where species accounts were present for the traits of interest and combined them to obtain a median estimate of each trait for each species.

| <b>Species Name</b>        | <b>Habitat Use<br/>(scale 1-5)*</b> | <b>Habitat<br/>Breadth<br/>(scale 1-3)**</b> | <b>Median<br/>adult body<br/>size (snout-<br/>vent-length<br/>in mm)</b> | <b>Median<br/>larval<br/>period<br/>(weeks)</b> | <b>Median<br/>age at<br/>sexual<br/>maturity<br/>(months)</b> | <b>Median<br/>lifespan<br/>(years)</b> | <b>Median<br/>number<br/>of eggs<br/>laid per<br/>year</b> | <b>Geographic<br/>range size<br/>(km<sup>2</sup>)</b> |
|----------------------------|-------------------------------------|----------------------------------------------|--------------------------------------------------------------------------|-------------------------------------------------|---------------------------------------------------------------|----------------------------------------|------------------------------------------------------------|-------------------------------------------------------|
| <i>Anaxyrus americanus</i> | 2.72                                | 2.58                                         | 80                                                                       | 1.75                                            | 48                                                            | 10                                     | 10850                                                      | 5600000                                               |
| <i>Anaxyrus boreas</i>     | 3.2                                 | 2.6                                          | 100                                                                      | 2                                               | 48                                                            | 8.5                                    | 9750                                                       | 347500                                                |
| <i>Anaxyrus fowleri</i>    | 2.8                                 | 2.79                                         | 68.5                                                                     | 1.5                                             | 24                                                            | 4.5                                    | 9000                                                       | 2035000                                               |
| <i>Anaxyrus terrestris</i> | 2.92                                | 2.89                                         | 76                                                                       | 1.5                                             | 36                                                            | 9                                      | 3250                                                       | 547500                                                |
| <i>Hyla squirella</i>      | 2.33                                | 1.95                                         | 33                                                                       | 1.5                                             | 18                                                            | 8.5                                    | 1000.5                                                     | 730000                                                |
| <i>Hyla versicolor</i>     | 2.86                                | 2.25                                         | 46                                                                       | 1.5                                             | 24                                                            | 8                                      | 1800                                                       | 2265000                                               |
| <i>Hyla wrightorum</i>     | 2                                   | 1.85                                         | 37.5                                                                     | 2                                               | 18                                                            | 8.25                                   | 75                                                         | 145000                                                |

|                                   |      |      |      |      |    |      |          |         |
|-----------------------------------|------|------|------|------|----|------|----------|---------|
| <i>Lithobates catesbeianus</i>    | 4.22 | 1.54 | 116  | 19.5 | 36 | 8.5  | 24,743.5 | 4457500 |
| <i>Lithobates clamitans</i>       | 3.83 | 2.03 | 80   | 19   | 36 | 5.5  | 4000     | 3672500 |
| <i>Lithobates pipiens</i>         | 3.53 | 1.95 | 80.5 | 4    | 24 | 6.5  | 3974     | 5945000 |
| <i>Lithobates sphenoccephalus</i> | 3.38 | 2.2  | 75   | 2.75 | 20 | 4    | 3277     | 1965000 |
| <i>Lithobates sylvaticus</i>      | 2.78 | 2.11 | 60   | 3    | 24 | 4    | 1650     | 40000   |
| <i>Pseudacris crucifer</i>        | 2.96 | 2.32 | 29   | 2.25 | 24 | 3    | 890.5    | 3982500 |
| <i>Pseudacris feriarum</i>        | 2.72 | 2.33 | 29.5 | 3.25 | 18 | 2    | 831.5    | 1430000 |
| <i>Pseudacris ornata</i>          | 2.32 | 1.58 | 32.5 | 3.5  | 12 | 2.25 | 58       | 367500  |
| <i>Pseudacris regilla</i>         | 2.92 | 2.47 | 35   | 2.5  | 18 | 3    | 575      | 1575000 |
| <i>Pseudacris triseriata</i>      | 2.59 | 2.29 | 24.5 | 2.5  | 18 | 5    | 1000     | 3485000 |
| <i>Rana aurora</i>                | 3.29 | 2.26 | 88   | 5    | 24 | 11.5 | 750      | 292500  |
| <i>Rana cascadae</i>              | 3.46 | 2    | 65   | 2    | 48 | 6    | 550      | 115000  |
| <i>Rana luteiventris</i>          | 3.4  | 2.25 | 70   | 4.5  | 42 | 8    | 1275     | 1315000 |

\* Habitat use scale spanned from 1 (highly ephemeral) to 5 (permanent): (1) Dries within weeks with no or few small invertebrate predators, (2) dries every year with few small invertebrate predators, (3) dries every few years and occasionally has large invertebrate predators, (4) never dries and has large invertebrate predators, (5) never dries and has fish and large invertebrate predators.

\*\* Habitat breadth spanned from 1 (only 1 type of habitat occupied) to 3 (the species exists in all habitats, or exhibits broader habitat usage across a range of habitat types).
