# Supplementary material for: Linking Ecology and Epidemiology to Understand Predictors of Multi-Host Responses to an Emerging Pathogen, the Amphibian Chytrid Fungus
Source: PubMed Central journal article supplement (PMC5240985; doi:10.1371/journal.pone.0167882), 2017-01-17

**S1 Figure.** Non-linear relationships from GAM analysis. There were non-linear relationships between (A) geographic range size and average infection load, (B) lifespan and infection load, (C) average mass at metamorphosis and infection load, (D) eggs laid per year and hazard ratio and (E) geographic range size and hazard ratio.

**A.**

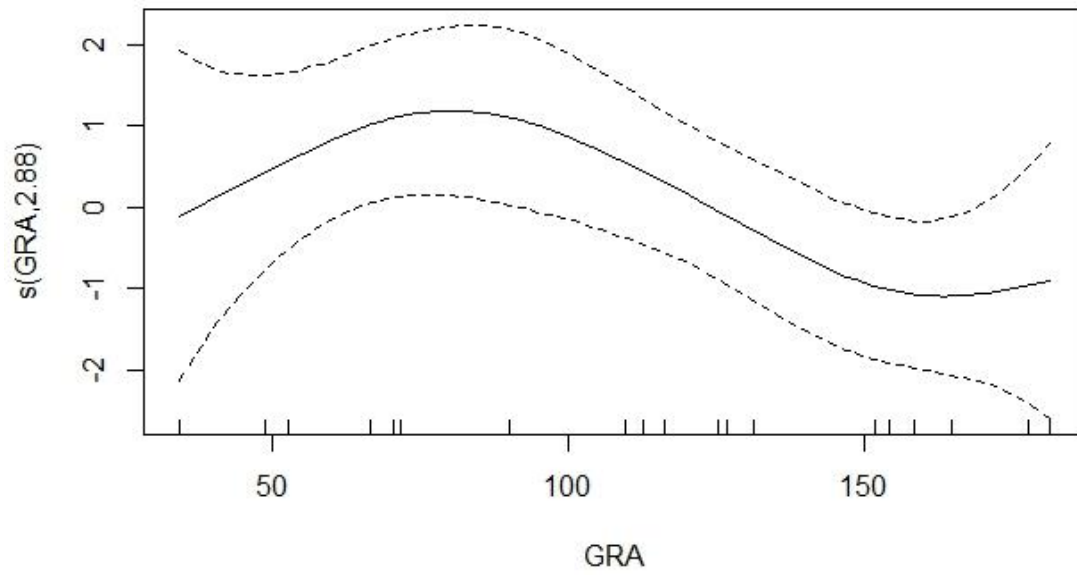

**B.**

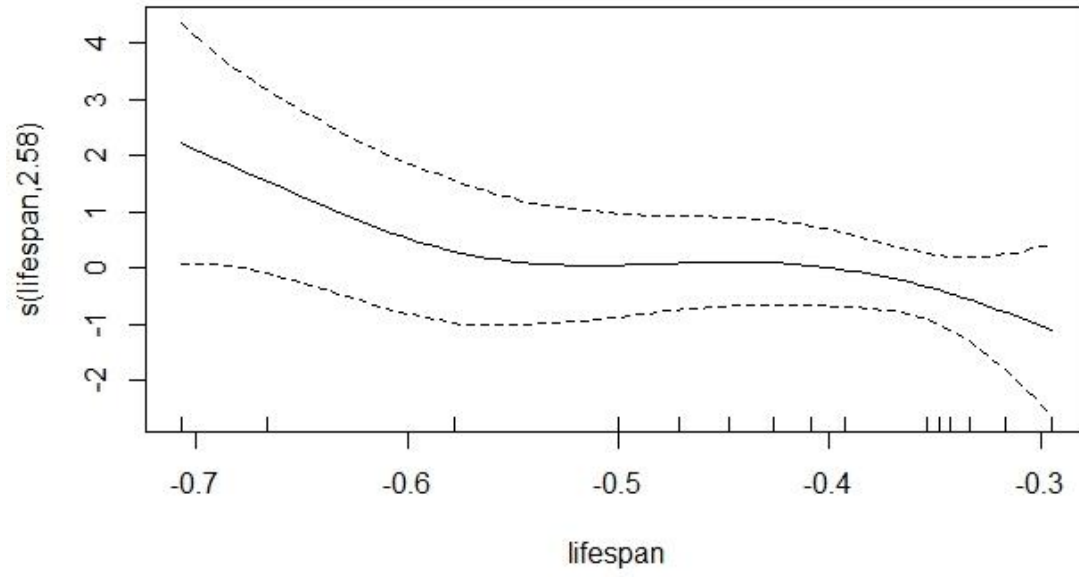

c.

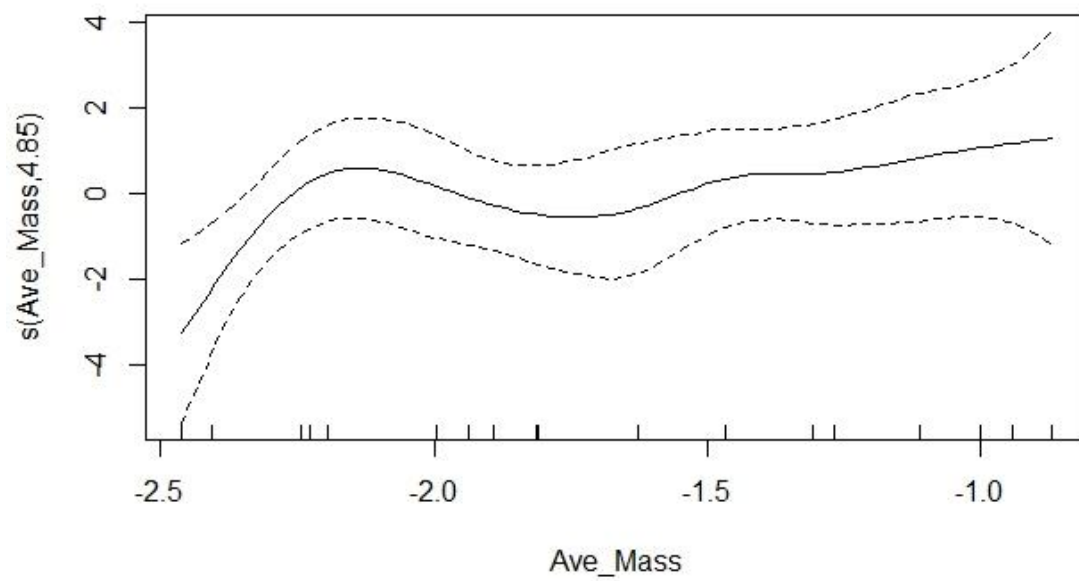

D.

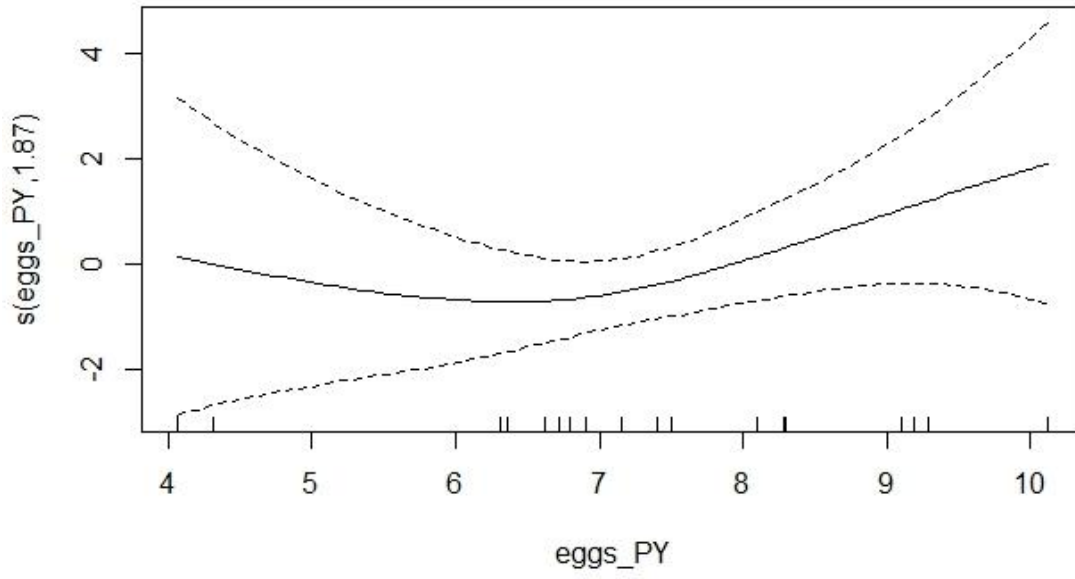

**E.**

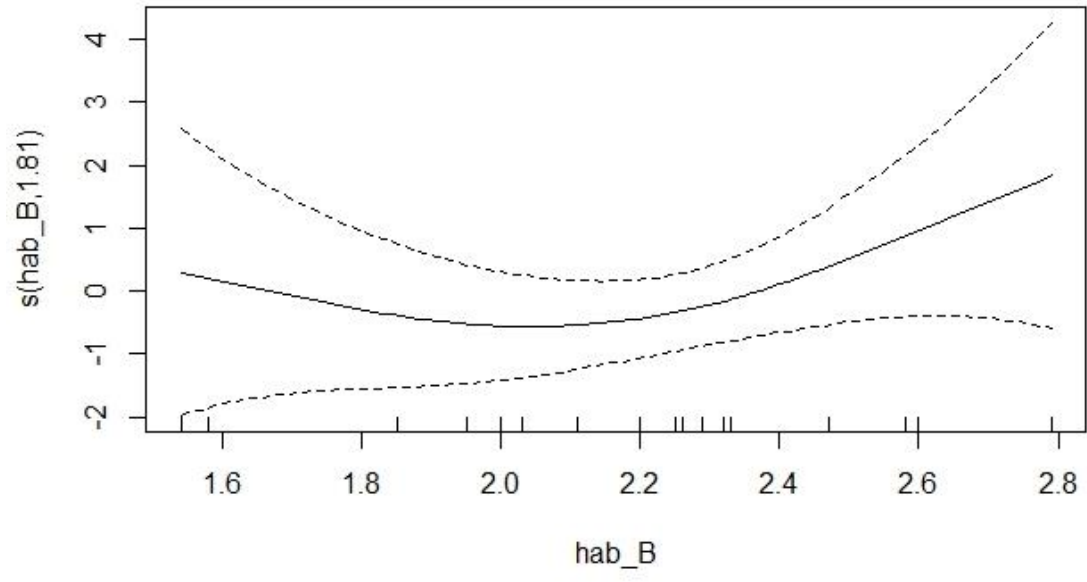

Supplement: pone.0167882.s008.pdf [file pone.0167882.s008.pdf]
